# Supplementary material for: A fluorescent, self-healing and pH sensitive hydrogel rapidly fabricated from HPAMAM and oxidized alginate with injectability
Source: Royal Society of Chemistry journal article supplement (doi:10.1039/c6ra02366e), 2016-01-01
Supplement: c6ra02366e1.pdf [file c6ra02366e1.pdf]

Supporting information for  
“Fluorescent, self-healing and pH sensitive hydrogel rapidly fabricated  
from HPAMAM and oxidized alginate with injectability”

Wen Yang, Xiaotian Wu, Fangbing Liu, Yan Dou and Wentao Hao\*

Department of Polymer Materials and Engineering, School of Chemistry and Chemical  
Engineering, Hefei University of Technology, Hefei, P.R. China 230009

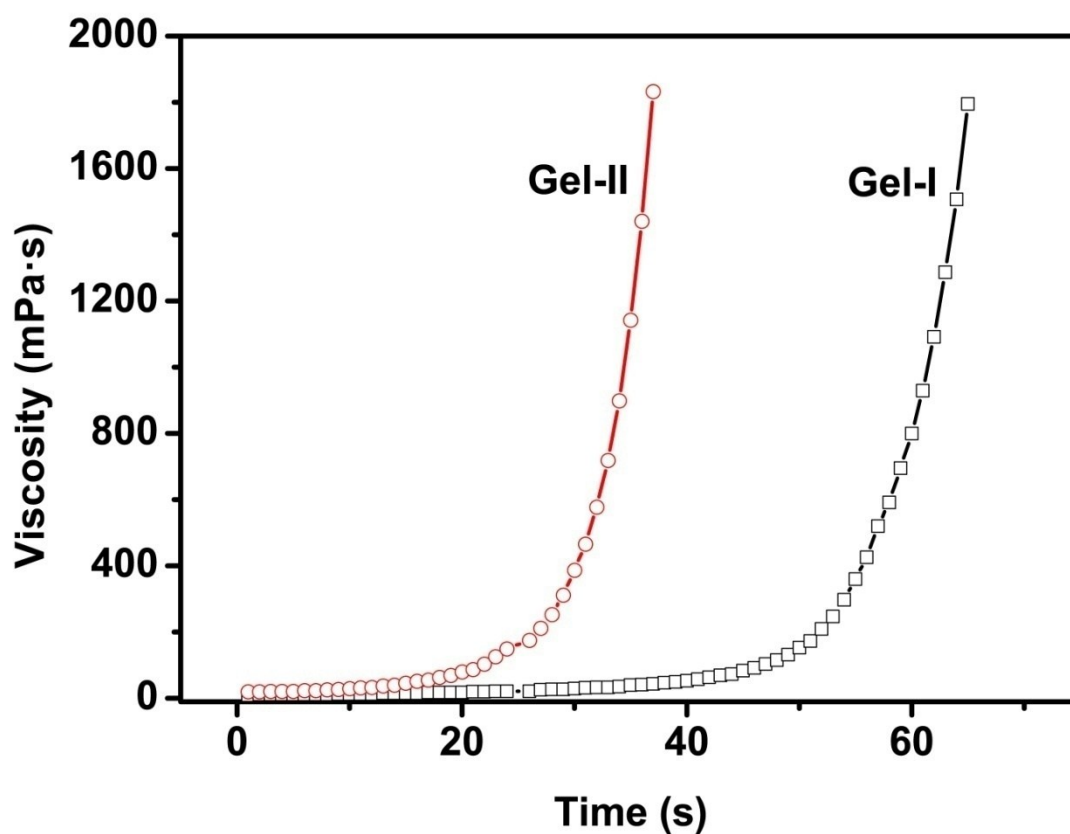

**Fig. S1** Viscosity of Gel-I and Gel-II. After the HPAMAM solutions and OALG solutions were mixed together, the viscosity of mixture solutions increased drastically within 1 minute.

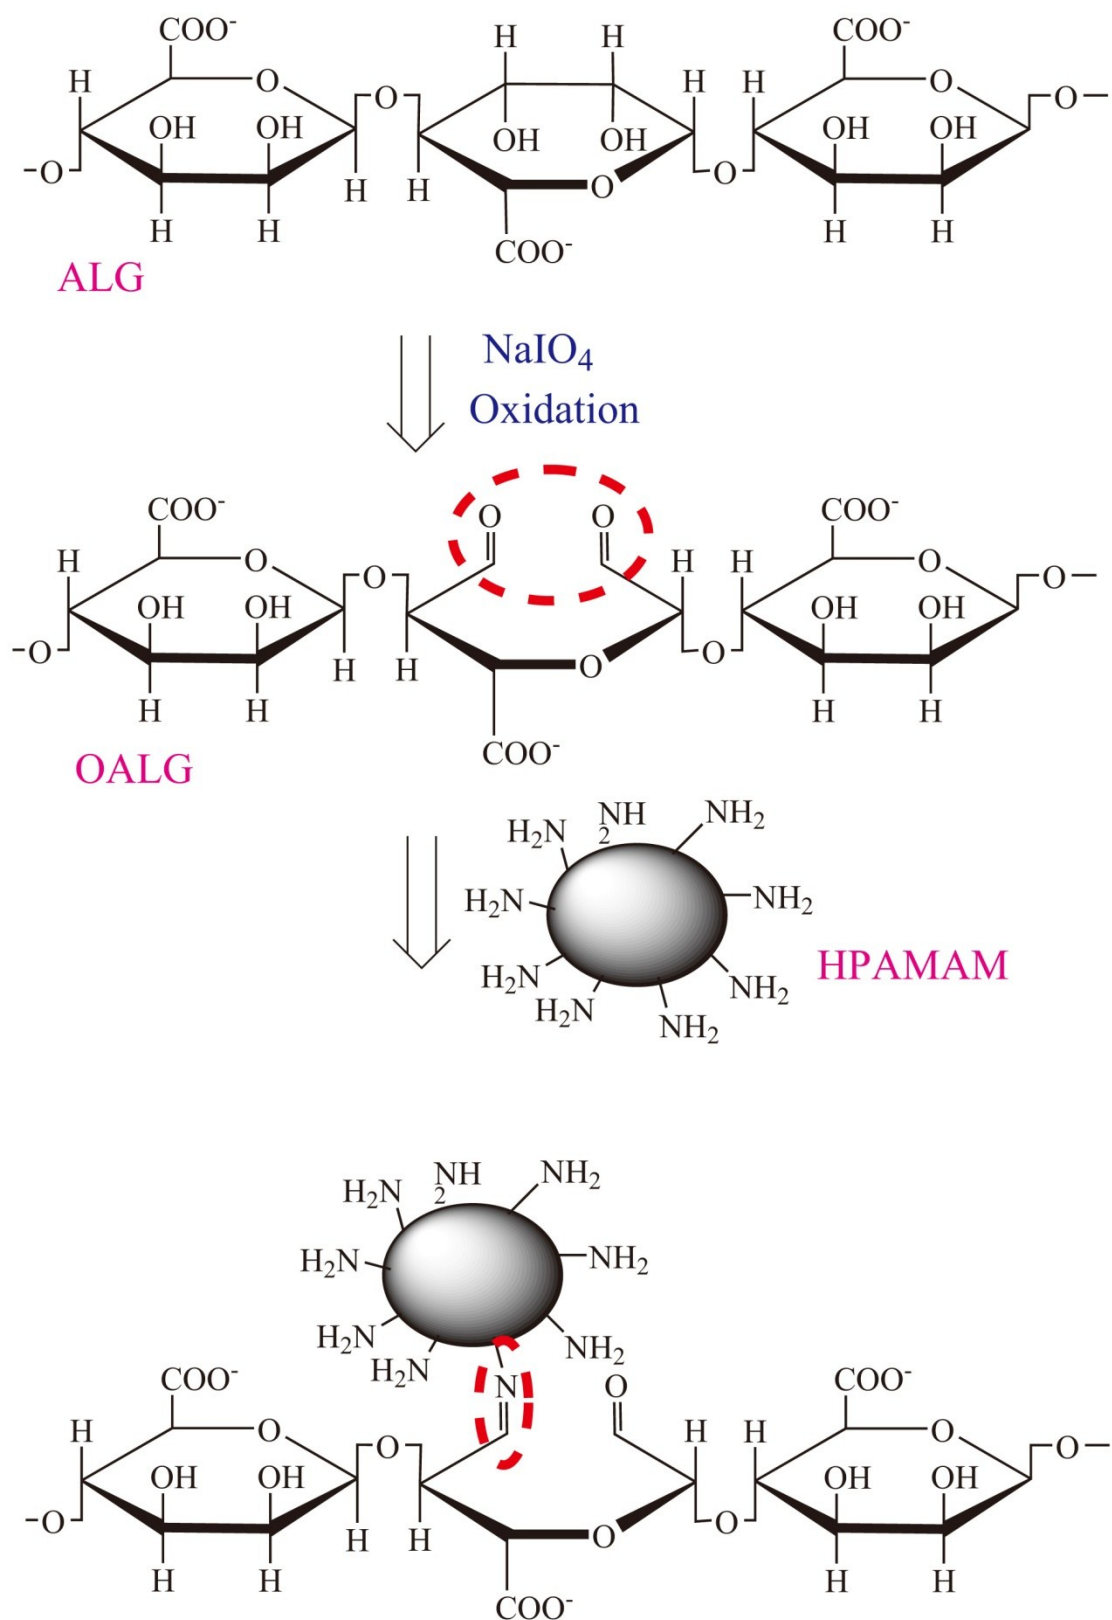

**Fig. S2** Schematic diagram of formation of Schiff bases between HPAMAM and OALG.

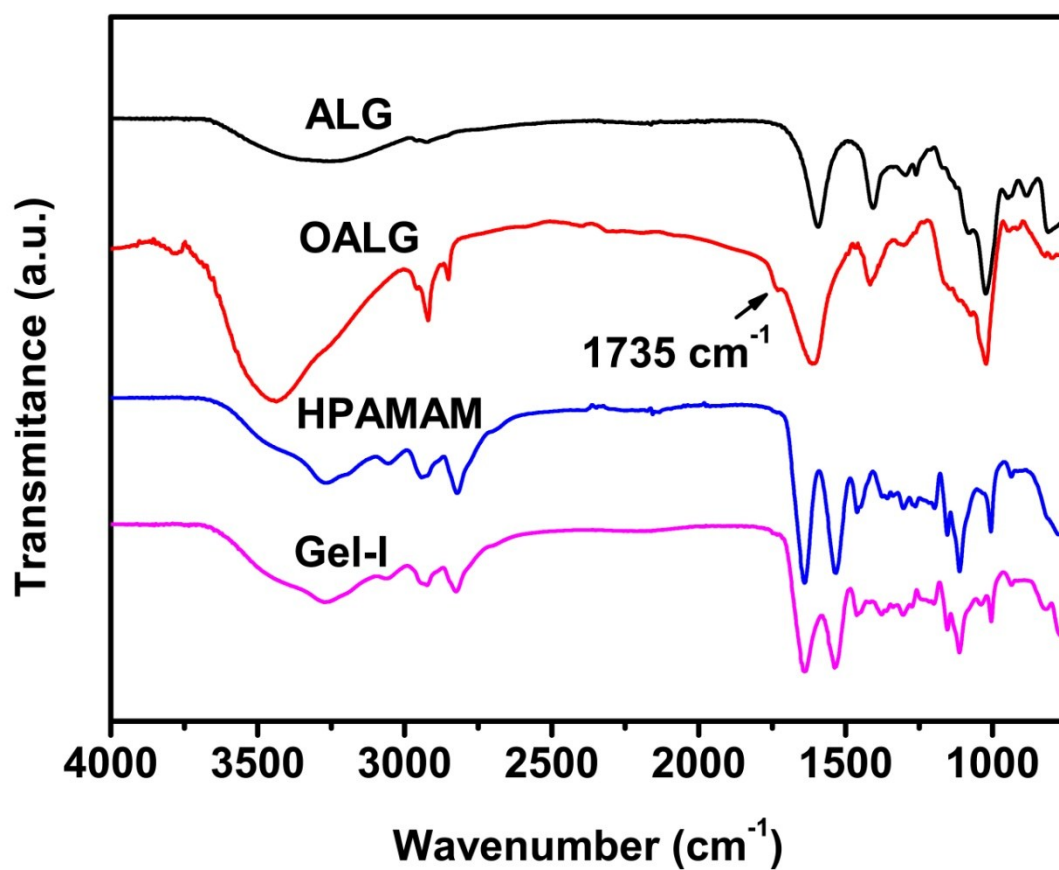

**Fig. S3** FTIR spectra of sodium alginate (ALG), oxidized ALG (OALG), HPAMAM and Gel-I. The absorption peak at 1735 cm<sup>-1</sup> indicated the presence of aldehyde groups on the OALG molecules.<sup>S1,S2</sup> This absorption peak disappeared on the spectrum of Gel-I, suggesting the consumption of the aldehyde groups.

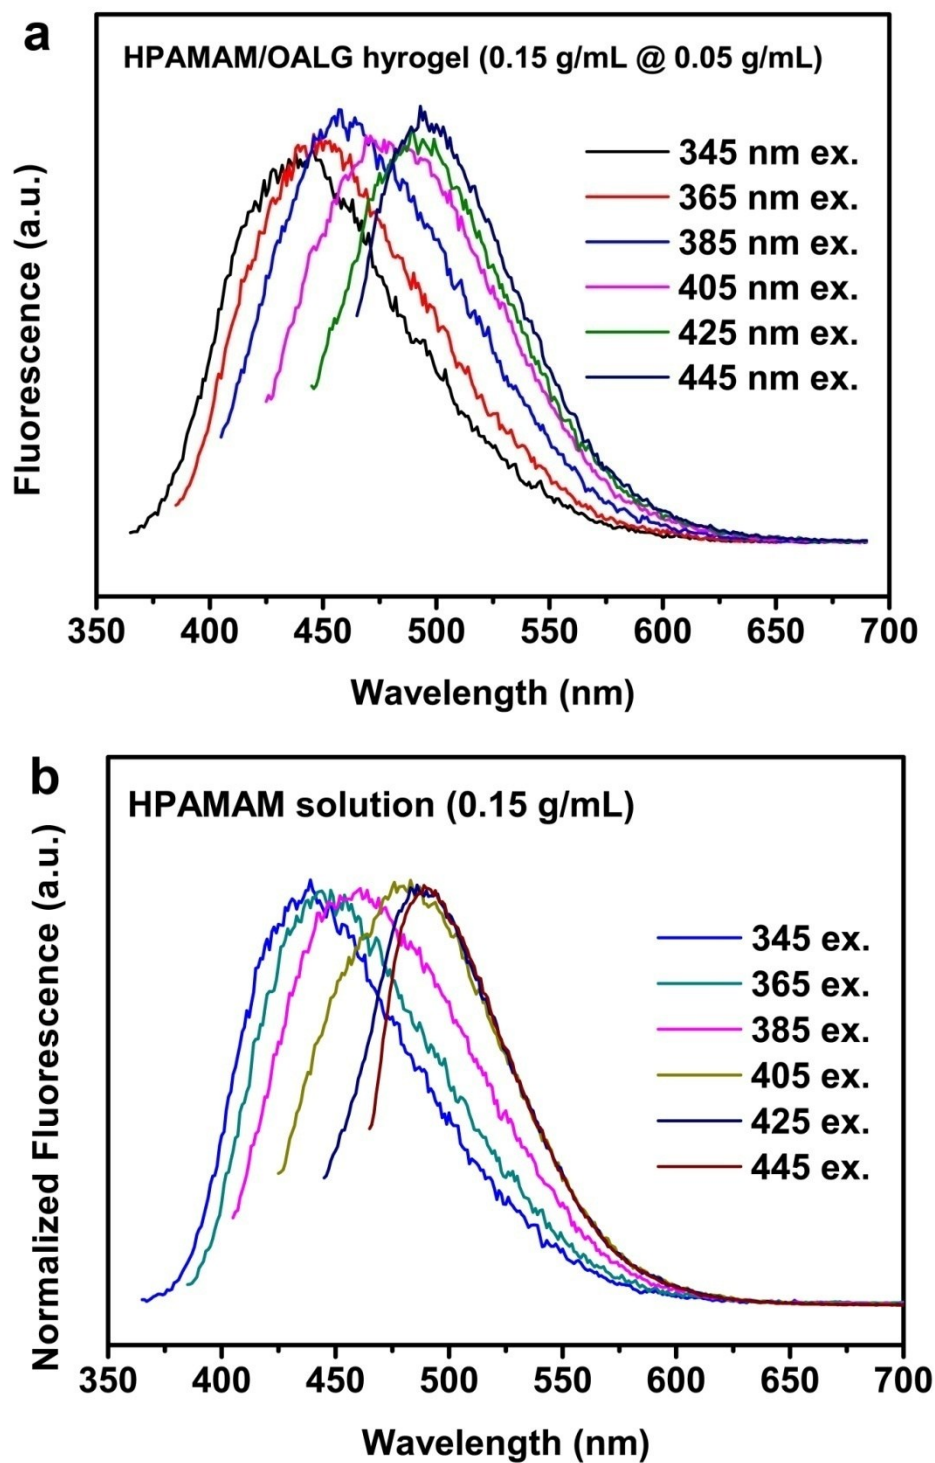

**Fig. S4** Fluorescent emission of HPAMAM/OALG hydrogel (Gel-I). Multiple emissions were found depending on the excitation wavelengths. It suggests that there are multiple excitation states, which is typical for the non-conjugated fluorescent polymeric materials.

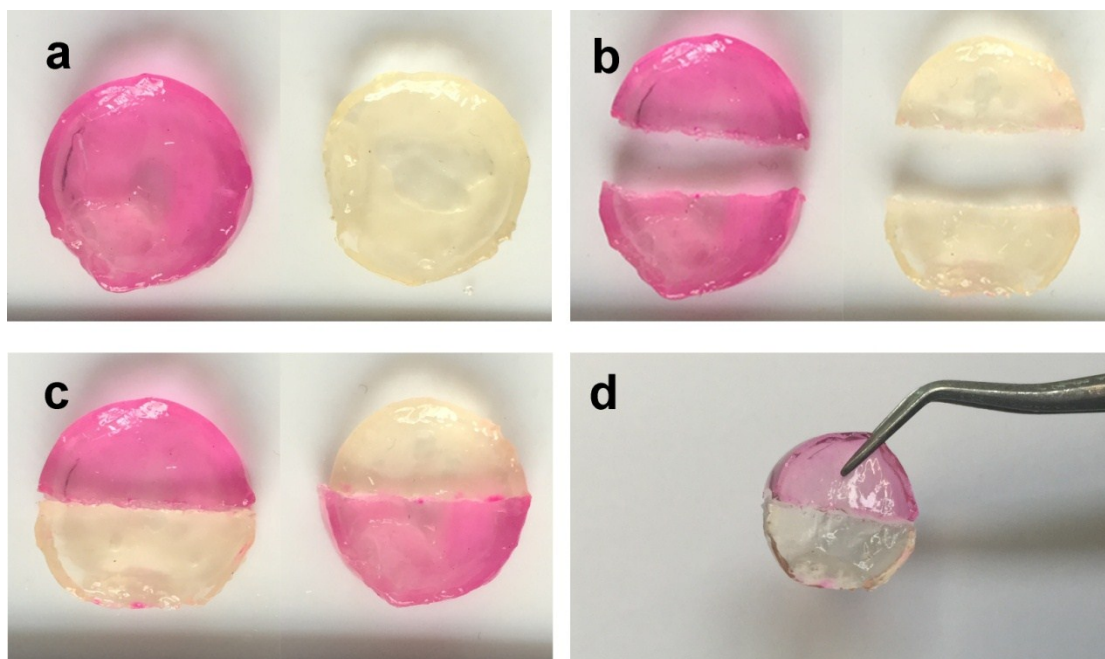

**Fig. S5** HPAMAM/OALG hydrogel self-healed at pH > 9.0. (a) The original hydrogel samples; (b) the samples were severed; (c) the severed samples were put to contact; (d) the hydrogel sample healed. The repaired sample could withstand its own weight. The pH value of HPAMAM solutions was adjusted to more than 9.0 by NaOH, and then it was mixed with the OALG solution to form alkaline hydrogels.

## References

- S1. Y. Jia, J. Fei, Y. Cui, Y. Yang, L. Gao and J. Li, *Chem. Commun.*, 2011, **47**, 1175.  
 S2. X. Ma, J. Deng, Y. Du, X. Li, D. Fan, C. Zhu, J. Hui, P. Ma and W. Xue, *J. Mater. Chem. B*, 2014, **2**, 2749.
